# Supplementary material for: Canakinumab for the treatment of autoinflammatory very early onset- inflammatory bowel disease
Source: Front Immunol. 2022 Sep 20;13:972114. doi: 10.3389/fimmu.2022.972114 (PMC9531243; doi:10.3389/fimmu.2022.972114)
Supplement: Supplementary file 1 [file Table_1.xlsx]

## Sheet: Sheet1
Supplementary Table 1: Lymphocyte subsets (%, absolute value) by patient with normal ranges for age
		CD3+		CD3+/CD4+		CD3+/CD8+		CD19+		CD20+		CD3-/CD16(B73.1)+ and/or CD56+		CD4+/CD45RA+		CD4+/CD45R0+		CD4+/CD8+ Ratio
Subject		Percentage	Absolute	Percentage	Absolute	Percentage	Absolute	Percentage	Absolute	Percentage	Absolute	Percentage	Absolute	Percentage	Absolute	Percentage	Absolute
1	Value	81.3	7480	45.5	4186	34.9	3,211	11.7	1076	11.6	1,067	6.1	561	41.7	3,836	2.5	230	1.3
	Normal Range	54 - 76 %	1,600 - 6,700	31 - 54 %	1,000 - 4,600	12 - 28 %	400 - 2,100	15 - 39 %	600 - 2,700	3.1 - 21.5 %	0 - 479	3 - 17 %	200 - 1,200	12.5 - 42.2 %	41 - 1,121	10.1 - 27.9 %	153 - 582	1.3 - 3.9
2	Value	51.6	4123	37.1	2,964	13.1	1047	40.8	3,260	40.2	3,212	7	559	29.3	2,341	5.1	407	2.8
	Normal Range	43 - 76 %	900 - 4,500	23 - 48 %	500 - 2,400	14 - 33 %	300 - 1,600	14 - 44 %	200 - 2,100	3.1 - 21.5 %	0 - 479	4 - 23 %	100 - 1,000	12.5 - 42.2 %	41 - 1,121	10.1 - 27.9 %	153 - 582	0.9 - 2.9
3	Value	67.8	6041	53.2	4740	13.4	1194	25.4	2263	25.2	2,245	6.8	606	46.7	4,161	4.7	419	4.0
	Normal Range	50 - 77 %	2,400 - 6,900	33 - 58 %	1,400 - 5,100	13 - 26 %	600 - 2,200	13 - 35 %	700 - 2,500	3.1 - 21.5 %	0 - 479	2 - 13 %	100 - 1,000	12.5 - 42.2 %	41 - 1,121	10.1 - 27.9 %	153 - 582	1.6 - 3.8
4	Value	76.1	4802	62	3912	13.6	858	15.2	959	15.1	953	8.2	517	55.9	3,527	3.7	233	4.6
	Normal Range	60 - 85 %	2,300 - 7,000	41 - 68 %	1,700 - 5,300	9 - 23 %	400 - 1,700	4 - 26 %	600 - 1,900	3.1 - 21.5 %	0 - 479	3 - 23 %	200 - 1,400	12.5 - 42.2 %	41 - 1,121	10.1 - 27.9 %	153 - 582	1.3 - 6.3
5	Value	77.4	2740	57.3	2028	18.5	655	13.9	492	12.8	453	8.1	287	44.6	1,579	11.2	396	3.1
	Normal Range	39 - 73 %	1,400 - 8,000	25 - 50 %	900 - 5,500	11 - 32 %	400 - 2,300	17 - 41 %	600 - 3,100	3.1 - 21.5 %	0 - 479	3 - 16 %	100 - 1,400	12.5 - 42.2 %	41 - 1,121	10.1 - 27.9 %	153 - 582	0.9 - 3.7
6	Value	65.4	2636	45.4	1830	16	645	30.0	1,209	29.9	1,205	4.5	181	26.9	1084	19	766	2.8
	Normal Range	52 - 78 %	800 - 3,500	25 - 48 %	400 - 2,100	9 - 35 %	200 - 1,200	8 - 24 %	200 - 600	3.1 - 21.5 %	0 - 479	6 - 27 %	70 - 1,200	12.5 - 42.2 %	41 - 1,121	10.1 - 27.9 %	153 - 582	0.9 - 3.4
7	Value	70.8	4715	47.1	3137	19.7	1312	24.3	1618	23.0	1,532	5	333	33	2,198	12.9	859	2.4
	Normal Range	39 - 73 %	1,400 - 8,000	25 - 50 %	900 - 5,500	11 - 32 %	400 - 2,300	17 - 41 %	600 - 3,100	3.1 - 21.5 %	0 - 479	3 - 16 %	100 - 1,400	12.5 - 42.2 %	41 - 1,121	10.1 - 27.9 %	153 - 582	0.9 - 3.7
8	Value	51.3	929	30	543	18	326	35.5	643	35.3	639	11.2	203	22	398	8.1	147	1.7
	Normal Range	43 - 76 %	900 - 4,500	23 - 48 %	500 - 2,400	14 - 33 %	300 - 1,600	14 - 44 %	200 - 2,100	3.1 - 21.5 %	0 - 479	4 - 23 %	100 - 1,000	12.5 - 42.2 %	41 - 1,121	10.1 - 27.9 %	153 - 582	0.9 - 2.9
9	Value	82.6	5600	54.6	3702	28.8	1,953	15.4	1044	15.2	1,031	2.1	142	48.7	3,302	4.8	325	1.9
	Normal Range	48 - 75 %	2,300 - 6,500	33 - 58 %	1,500 - 5,000	11 - 25 %	500 - 1,600	14 - 39 %	600 - 3,000	3.1 - 21.5 %	0 - 479	2 - 14 %	100 - 1,300	12.5 - 42.2 %	41 - 1,121	10.1 - 27.9 %	153 - 582	1.7 - 3.9
10	Value	72.4	9,318	43.5	5,598	27.9	3,591	24.2	3,115	24.0	3,089	3.6	463	38.8	4,994	2.6	335	1.6
	Normal Range	48 - 75 %	2,300 - 6,500	33 - 58 %	1,500 - 5,000	11 - 25 %	500 - 1,600	14 - 39 %	600 - 3,000	3.1 - 21.5 %	0 - 479	2 - 14 %	100 - 1,300	12.5 - 42.2 %	41 - 1,121	10.1 - 27.9 %	153 - 582	1.7 - 3.9
11	Value	62.3	10,105	39.5	6,407	20.8	3,374	26.3	4,266	26.3	4,266	11.1	1,800	34	5,515	3.0	487	1.9
	Normal Range	54 - 76 %	1,600 - 6,700	31 - 54 %	1,000 - 4,600	12 - 28 %	400 - 2,100	15 - 39 %	600 - 2,700	3.1 - 21.5 %	0 - 479	3 - 17 %	200 - 1,200	12.5 - 42.2 %	41 - 1,121	10.1 - 27.9 %	153 - 582	1.3 - 3.9
12	Value	47.3	1963	30.3	1257	15.7	652	40.1	1664	40.0	1,660	11.4	473	24.7	1025	4.3	178	1.9
	Normal Range	54 - 76 %	1,600 - 6,700	31 - 54 %	1,000 - 4,600	12 - 28 %	400 - 2,100	15 - 39 %	600 - 2,700	3.1 - 21.5 %	0 - 479	3 - 17 %	200 - 1,200	12.5 - 42.2 %	41 - 1,121	10.1 - 27.9 %	153 - 582	1.3 - 3.9
13	Value	65.2	3866	27.6	1637	36.1	2,141	23.6	1399	23.6	1,399	10.6	629	20.3	1,204	6.5	385	0.8
	Normal Range	43 - 76 %	900 - 4,500	23 - 48 %	500 - 2,400	14 - 33 %	300 - 1,600	14 - 44 %	200 - 2,100	3.1 - 21.5 %	0 - 479	4 - 23 %	100 - 1,000	12.5 - 42.2 %	41 - 1,121	10.1 - 27.9 %	153 - 582	0.9 - 2.9
14	Value	50.1	4499	38.5	3,457	9.1	817	42.7	3,834	39.4	3,538	6	539	30.6	2,748	5.4	485	4.2
	Normal Range	43 - 76 %	900 - 4,500	23 - 48 %	500 - 2,400	14 - 33 %	300 - 1,600	14 - 44 %	200 - 2,100	3.1 - 21.5 %	0 - 479	4 - 23 %	100 - 1,000	12.5 - 42.2 %	41 - 1,121	10.1 - 27.9 %	153 - 582	0.9 - 2.9
15	Value	60.8	1002	28.7	473	29.7	490			31.5	519	3.2	53
	Normal Range	43 - 76 %	900 - 4,500	23 - 48 %	500 - 2,400	14 - 33 %	300 - 1,600			0 - 479	0.9 - 2.9	4 - 23 %	100 - 1,000
16	Value	71.6	874	32.4	395	35.0	427	24.3	296	23.6	288	4.1	50	9.1	111	21.6	264	0.9
	Normal Range	55 - 78 %	700 - 4,200	27 - 53 %	300 - 2,000 CELLS/uL	19 - 34 %	300 - 1,800	10 - 31 %	200 - 1,600	3.1 - 21.5 %	0 - 479	4 - 26 %	90 - 900	12.5 - 42.2 %	41 - 1,121	10.1 - 27.9 %	153 - 582	0.9 - 2.6
17	Value	84.2	3621	27.8	1195	51.3	2206	0.085	366			5.6	241					0.54
	Normal Range	55-78%	700 - 4,200	27 - 53%	300-2,000	19-34%	300 - 1,800	10 - 31 %	200 - 1,600			4-26%	90 - 900					0.92-3.72
18	Value	66.8	3566	42.1	2247	21.5	1148	28.9	1543	29.1	1553	4.8	256
	Normal Range	43-76%	900 - 4,500	23-48%	500 - 2,400	14-33%	300 - 1,600	14-44%	200 - 2,100	3.1 - 21.5%	0 - 479	4 - 23 %	100-1,000
19	Value	77.4	2624	38.5	1305	35.1	1190	12.5	424	12.3	417	9.5	322	30.8	1044	8.8	298	1.1
	Normal Range	55-78%	700-4,200	27-53%	300 - 2000	19-34%	300 - 1, 800	10-31%	200 - 1,600	3.1 - 21.5 %	0- 479	4 - 26%	90 - 900	12.5 - 42.2 %	41 - 1,121	10.1 - 27.9 %	153 - 582	0.9 - 2.9
Red font denotes value above range
Blue font denotes low value below range
